# Supplementary material
Source: ML conference proceedings conference paper supplement (https://openaccess.thecvf.com/content/ACCV2022/html/Li_3D-Yoga_A_3D_ACCV_2022_paper.html)
Supplement: Supplementary file 1 [file Li_3D-Yoga_A_3D_ACCV_2022_supplemental.pdf]

# 3D-Yoga: A 3D Yoga Dataset for Visual-based Hierarchical Sports Action Analysis

Jianwei Li<sup>1</sup>, Haiqing Hu<sup>1</sup>, Jinyang Li<sup>1</sup>, and Xiaomei Zhao<sup>2</sup>

<sup>1</sup> Beijing Sports University, Beijing 100084, P.R. China

<sup>2</sup> Shandong Jianzhu University, Jinan 250101, P.R. China

{jianwei, hhq, ljy}@bsu.edu.cn, zhaoxiaomei20@sdjzu.edu.cn

## 1 3D-Yoga Dataset

### 1.1 Subjects information

There are 22 subjects (7 males and 15 females) participated in the capturing of yoga poses. Each subject has a different BMI and yoga level. The specific information of them is shown in Table 1 and Table 2.

Table 1: Basic information of the subjects

| Body mass index | Male | Female | Number |
|-----------------|------|--------|--------|
| BMI>26          | 2    | 4      | 6      |
| 19<BMI<23       | 3    | 8      | 11     |
| BMI<18          | 2    | 3      | 5      |

Table 2: Clothing information of the subjects

| Clothing types | Male | Female | Number |
|----------------|------|--------|--------|
| Sports wear    | 2    | 4      | 6      |
| Yoga wear      | 1    | 6      | 7      |
| Sleep wear     | 1    | 2      | 3      |
| Leisure wear   | 3    | 3      | 6      |

### 1.2 Occluded joints analysis

We have calculated the average numbers of joints affected by self-occlusion in Classification I. Fig. 1 shows the comparison of 2.5D skeletons from the front and side cameras, and 3D fused skeletons. The vertical axis represents the average number of occluded joints under each category. It is clear that the number of occluded joints (red pillars) in 3D fused skeletons is lower than the original skeletons collected from the front and side cameras.

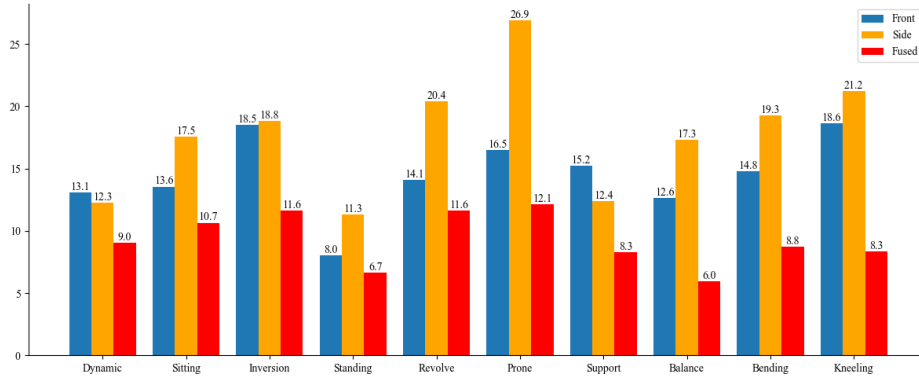

Fig. 1: The average numbers of occluded joints in Classification I.

### 1.3 Pose classification and assessment

Referenced to the exercises in *daily yoga*, there are 158 categories of yoga poses captured by us. In 3D-Yoga, the categories of yoga poses is adjusted to 117 to ensure that each label is different but covers all yoga formulas. Table 3, 4 and 5 show the two-level classification of these yoga poses. The criteria of completion score and difficulty coefficient for pose quality assessment are shown in Table 6 and Table 7 respectively.

## 2 Methods and Analysis

### 2.1 Cascade 2S-AGCN

Fig. 2 shows the architecture of the Cascaded 2S-AGCN, which consists of three levels. It is constructed by using 2S-AGCN models and fully connected layers with Dropout and ReLU. The trunk network and branches of Cascade 2S-AGCN are trained together. The input is the skeleton data, and the outputs of each level are the predicted results of Classification I, Classification II, and completion score respectively.

### 2.2 Experimental results

Due to the serious self-occlusion problem of yoga poses captured from a single view, the poor quality of original data may lead to poor fusion effect. According to the fusion quality, the fused 3D skeletons are divided into three parts: normal (N, 63.56%), poor (P, 15.75%) and bad (B, 20.69%). Where normal data is automatically fused with our method, poor data is fused with some manual corrections, and bad fused data has errors without corrections.

Table 8 shows the detailed quantitative analysis accuracies of yoga poses with Cascade 2S-AGCN. It can be seen that the analysis accuracies of most yoga poses (apart from *Revolve* and *Prone*) are higher when using fused 3D skeletons. Some accuracies of using combined data are also relatively high because the number of combined data is

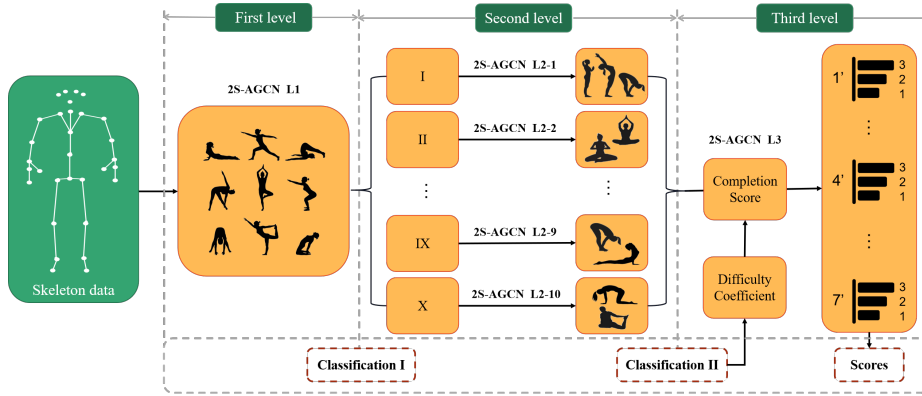

Fig. 2: Three-level cascaded 2S-AGCN networks.

larger than single view data and fused data. Table 9 shows detailed comparison results of the recognition accuracies (%) with ST-GCN, 2S-AGCN, and CTR-GCN. It is clear that the average accuracy of our method outperforms the state-of-the-art methods. The accuracies of ST-GCN, 2S-AGCN and our method are both improved by using the fused 3D skeletons in term of normal and poor data. Note that we interpolate the key frame data into sequence data with ten frames, so the accuracies of CTR-GCN are relatively higher by using single view data and combined data.

Fig. 3 shows visualization results of two yoga poses assessment for 4 subjects compared with the coach in the front view, and it can be seen that the performances and the scores are unified. The first subject is a professional yoga-trained practitioner, and her score is significantly higher than the other three amateur subjects.

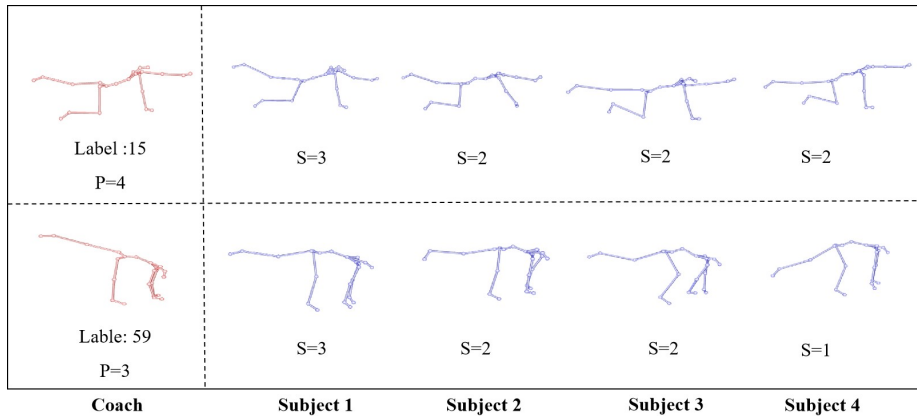

Fig. 3: Visualization examples of yoga pose assessment for 4 subjects.

Due to that most mainstream datasets for skeleton-based action analysis lack hierarchical semantic annotations, we cannot directly make experiments with our method. As shown in Table 10, we have clustered the semantic labels of NTU RGB+D 60 [2] into four categories. We tried to carry out the cross-subject experiment with our method by using the data of the C1 camera, and the coarse-gained and fine-gained accuracies (%) of single person poses are 87.97 and 76.03 respectively (learning rate =  $1e-3$ , batch size = 25, and epoch = 50).

## References

1. Chen, Y., Zhang, Z., Yuan, C., Li, B., Deng, Y., Hu, W.: Channel-wise topology refinement graph convolution for skeleton-based action recognition. In: Proceedings of the IEEE/CVF International Conference on Computer Vision. pp. 13359–13368 (2021)
2. Shahroudy, A., Liu, J., Ng, T.T., Wang, G.: Ntu rgb+d: A large scale dataset for 3d human activity analysis. In: IEEE Computer Society. pp. 1010–1019 (2016)
3. Shi, L., Zhang, Y., Cheng, J., Lu, H.: Two-stream adaptive graph convolutional networks for skeleton-based action recognition. In: Proceedings of the IEEE/CVF conference on computer vision and pattern recognition. pp. 12026–12035 (2019)
4. Yan, S., Xiong, Y., Lin, D.: Spatial temporal graph convolutional networks for skeleton-based action recognition. In: Thirty-second AAAI conference on artificial intelligence (2018)

Table 3: Poses classification index I.

| # Labels | Classification II<br>(pose name )                   | Original Labels<br>(1-158) | Classification I |
|----------|-----------------------------------------------------|----------------------------|------------------|
| 1        | cat pose to childs pose                             | 134                        |                  |
| 2        | half monkey pose to dragon pose (L&R)               | 138                        | I.               |
| 3        | standing apart to wreath pose                       | 141                        | Dynamic pose     |
| 4        | easy sun salutation                                 | 82                         |                  |
| 5        | angle seated                                        | 8,25,47,80,142             |                  |
| 6        | bound angle pose/butterfly pose                     | 65                         |                  |
| 7        | dynamic vizilla asana                               | 36,51                      |                  |
| 8        | hero pose                                           | 144                        |                  |
| 9        | hunker pranayama                                    | 67,112,123                 | II.              |
| 10       | sitting mountain pose                               | 124                        | Sitting          |
| 11       | sitting pranayama                                   | 12,145                     |                  |
| 12       | vizilla asana (L&R) alternate nostril breathing     | 64                         |                  |
| 13       | vizilla asana bird king pose (L&R)                  | 63                         |                  |
| 14       | vizilla asana cow face pose (L&R)                   | 53                         |                  |
| 15       | cow face pose (L&R)                                 | 99                         |                  |
| 16       | downward facing dog pose                            | 16,127                     | III.             |
| 17       | one-legged downward facing dog pose (L&R)           | 17,108                     | Inversion        |
| 18       | chair pose/powerful pose                            | 78,89,113                  |                  |
| 19       | high lunge (L&R)                                    | 22                         |                  |
| 20       | mountain pose                                       | 43,70,79,81                |                  |
| 21       | pull back chair pose/powerful pose                  | 19                         |                  |
| 22       | Standing pranayama                                  | 1                          | IV.              |
| 23       | variant chair pose/powerful pose                    | 18                         | Standing         |
| 24       | variant chair bird King pose/powerful pose<br>(L&R) | 90                         |                  |
| 25       | warrior II pose (L&R)                               | 84                         |                  |
| 26       | cervus (L&R)                                        | 101                        |                  |
| 27       | dynamic revolved pagoda                             | 2                          |                  |
| 28       | dynamic revolved wide legged forward bend           | 4                          |                  |
| 29       | easy revolved pose (L&R)                            | 125                        |                  |
| 30       | half lord of the fishes/seated spinal twist (L&R)   | 26                         | V.               |
| 31       | prone arm stretching (L&R)                          | 62                         | Revolve          |
| 32       | reclined spine revolved (L&R)                       | 10,27,35,153               |                  |
| 33       | revolved high lunge (L&R)                           | 7                          |                  |
| 34       | revolved lunge (L&R)                                | 88                         |                  |
| 35       | revolved reclined (L&R)                             | 97                         |                  |
| 36       | easy vinyasa                                        | 87                         |                  |
| 37       | pigeon pose (L&R)                                   | 74                         |                  |
| 38       | prone arm extending                                 | 61                         |                  |
| 39       | sleeping swan pose (L&R)                            | 128                        | VI.              |
| 40       | corpse                                              | 29,103                     | Prone pose       |
| 41       | dynamic happy baby                                  | 28                         |                  |
| 42       | happy childs pose                                   | 111                        |                  |
| 43       | reclined butterfly pose                             | 11,15                      |                  |

Table 4: Poses classification index II.

| # Labels | Classification II<br>(pose name)                       | Original Labels<br>(1-158) | Classification I |
|----------|--------------------------------------------------------|----------------------------|------------------|
| 44       | reclined butterfly warm uterus pose                    | 66                         |                  |
| 45       | reclined feet-catching pranayama                       | 94,95,104                  |                  |
| 46       | reclined warm uterus breathing                         | 133                        | VI.              |
| 47       | rock and roll                                          | 154                        | Prone pose       |
| 48       | supported recline leg up (L&R)                         | 98                         |                  |
| 49       | mermaid pose (L&R)                                     | 121                        |                  |
| 50       | cat pose                                               | 13,39,135,146              |                  |
| 51       | dragon pose (L&R)                                      | 109                        |                  |
| 52       | easy dragon pose                                       | 5                          |                  |
| 53       | fishtailing cat pose                                   | 136                        | VII.             |
| 54       | half monkey pose (L&R)                                 | 86                         | Support          |
| 55       | quadruped support                                      | 60                         |                  |
| 56       | supported dragon pose (L&R)                            | 137                        |                  |
| 57       | variant cat pose                                       | 14,147                     |                  |
| 58       | balancing gate pose (L&R)                              | 37                         |                  |
| 59       | boat pose                                              | 156                        |                  |
| 60       | cross balancing I (L&R)                                | 15                         |                  |
| 61       | cross balancing II (L&R)                               | 56                         |                  |
| 62       | easy warrior III pose (L&R)                            | 83                         |                  |
| 63       | goddess pose                                           | 45                         | VIII.            |
| 64       | half boat pose                                         | 152                        | Balance          |
| 65       | one-legged knee held (L&R)                             | 114                        |                  |
| 66       | side plank pose (L&R)                                  | 30                         |                  |
| 67       | split boat                                             | 93                         |                  |
| 68       | squat pose                                             | 116                        |                  |
| 69       | tree balancing pose                                    | 44                         |                  |
| 70       | back-stretching pose                                   | 102,157                    |                  |
| 71       | elbow-holding seated forward bend                      | 42                         |                  |
| 72       | feet-catching seated forward bend                      | 126                        |                  |
| 73       | half bound extended angle pose/butterfly pose<br>(L&R) | 9                          |                  |
| 74       | one-legged back extended (L&R)                         | 75,100                     |                  |
| 75       | reclined leg up                                        | 105                        |                  |
| 76       | reclined peak bending                                  | 96                         | IX.              |
| 77       | seated forward bend                                    | 6,117,130                  | Bending          |
| 78       | side extended wreath pose (L&R)                        | 140                        |                  |
| 79       | sitting forward bending                                | 68                         |                  |
| 80       | sitting leg up (L&R)                                   | 76                         |                  |
| 81       | standing forward bend                                  | 20                         |                  |
| 82       | strap-on wreath (L&R)                                  | 46                         |                  |
| 83       | straddle seated forward bend                           | 91                         |                  |
| 84       | supported downward facing dog pose                     | 107                        |                  |
| 85       | supported seated forward bend                          | 110                        |                  |
| 86       | wide legged forward bend                               | 3,115                      |                  |

Table 5: Poses classification index III.

| # Labels | Classification II<br>(pose name )                    | Original Labels<br>(1-158) | Classification I |
|----------|------------------------------------------------------|----------------------------|------------------|
| 87       | wreath pose                                          | 77,92,139                  |                  |
| 88       | wreath pose II                                       | 24                         |                  |
| 89       | wide angle stretching                                | 132                        |                  |
| 90       | wreath seated forward bend                           | 48                         |                  |
| 91       | back bending Vizilla Asana                           | 54                         |                  |
| 92       | camel pose                                           | 118                        |                  |
| 93       | crescent pose (L&R)                                  | 21                         |                  |
| 94       | half reclined hero pose                              | 143                        |                  |
| 95       | locust pose                                          | 150                        |                  |
| 96       | seated butt lift back-bending (L&R)                  | 69                         |                  |
| 97       | shoulder bridge pose                                 | 122                        |                  |
| 98       | sphinx pose                                          | 148                        |                  |
| 99       | upward facing dog pose                               | 151                        | IX.<br>Bending   |
| 100      | back bending downward prayer warrior I pose<br>(L&R) | 71                         |                  |
| 101      | variant one-legged locust pose (L&R)                 | 149                        |                  |
| 102      | extended side angle pose (L&R)                       | 33,40,85                   |                  |
| 103      | extended triangle pose (L&R)                         | 32,41                      |                  |
| 104      | gate pose (L&R)                                      | 34                         |                  |
| 105      | intense side stretch pose (L&R)                      | 72                         |                  |
| 106      | kneel sideways (L&R)                                 | 31                         |                  |
| 107      | side bending gate pose (L&R)                         | 38                         |                  |
| 108      | side bending half bound angle (L&R)                  | 129                        |                  |
| 109      | side bending vizilla asana (L&R)                     | 52                         |                  |
| 110      | arm-circling cat pose (L&R)                          | 55                         |                  |
| 111      | equestrian pose feet-catching                        | 59                         |                  |
| 112      | equestrian pose (L&R)                                | 57                         |                  |
| 113      | baby downward prayer pose                            | 50,158                     | X.<br>Kneeling   |
| 114      | childs pose (pranayama)                              | 49,73                      |                  |
| 115      | dynamic equestrian pose (L&R)                        | 58                         |                  |
| 116      | rabbit pose                                          | 120,131                    |                  |
| 117      | worship                                              | 23,106,119                 |                  |

Table 6: Criteria description of completion score (*S*) for yoga pose quality assessment.

| Scores | #Criteria | Descriptions                                                                                                                                                     |
|--------|-----------|------------------------------------------------------------------------------------------------------------------------------------------------------------------|
| 3      | S         | Keep flat when the limbs or body completes the support tasks;<br>The support point consistent with the standard action.                                          |
|        | B         | Support parts and body should be kept medium and stable;<br>And parts that should not contact the ground leave the ground completely.                            |
|        | P&T       | Fully complete the bending angle in standard action.                                                                                                             |
| 2      | S         | Minor unreasonable bending of the limbs or body,<br>Or support point are nuanced from the standard movement.                                                     |
|        | B         | Support parts and body produces a small displacement or the body has shaking;<br>And parts that should not contact the ground leave the ground completely.       |
|        | P&T       | Complete 75% of the bending angle in the standard action;<br>Or beyond the standard action angle.                                                                |
| 1      | S         | The limbs or body is greatly unreasonably bent when completing support tasks;<br>And support points are different from the standard action.                      |
|        | B         | Support parts and body produce a small displacement or the body has shaking;<br>Or parts of the body should not touch the ground partially contact the ground.   |
|        | P&T       | Complete 50% of the bending angle in the standard action;<br>Or the limbs should be kept straight have a small bend.                                             |
| 0      | S         | The limbs or body is greatly unreasonably bent when completing support tasks;<br>And support points are more different from the standard action.                 |
|        | B         | Support parts and body produces a large displacement or the body has shaking;<br>Or parts of the body should not touch the ground completely contact the ground. |
|        | P&T       | The completion range in the flexion action is very small;<br>And the limbs that should be kept straight are greatly bent.                                        |

Table 7: Criteria of difficulty coefficient (*P*) for yoga pose quality assessment.

| Scores | # Lables                                                                          |
|--------|-----------------------------------------------------------------------------------|
| 1      | 9,10,11,12,20,22,38,40,41,42,46,50,55,75,76,112,114,117                           |
| 2      | 1,7,13,14,16,18,23,26,27,28,29,39,47,53,57,63,64,84,93,98,102,103,109,110,113,115 |
| 3      | 21,24,25,30,31,32,35,36,37,49,52,54,56,59,62,65,69,73,74,83,85,97,99,111          |
| 4      | 2,5,15,17,19,43,44,45,48,51,60,66,68,70,77,81,91,96,100,101,116                   |
| 5      | 6,8,33,34,58,67,71,72,78,79,87,88,92,94,95,105,106                                |
| 6      | 3,4,61,82,86,6,90                                                                 |
| 7      | 80,104,107,108                                                                    |



Table 8: Analysis accuracies (%) of yoga poses in 3D-Yoga. The best results are in bold.

| Stages | Categories    | Number | Front      | Side         | Combined     | Fused        |              |       |
|--------|---------------|--------|------------|--------------|--------------|--------------|--------------|-------|
|        |               |        |            |              |              | N            | N+P          | N+P+B |
| I      | Coarse-gained | 10     | 75.60      | 71.87        | 77.18        | <b>80.42</b> | 76.98        | 74.64 |
|        | Dynamic       | 4      | 77.6       | 68.86        | 78.14        | 73.73        | <b>78.79</b> | 78.68 |
|        | Sitting       | 11     | 74.65      | 69.91        | 85.64        | <b>87.29</b> | 77.84        | 70.50 |
|        | Inversion     | 2      | <b>100</b> | 93.48        | <b>100</b>   | 92.31        | <b>100</b>   | 95.65 |
|        | Standing      | 8      | 83.77      | 72.08        | 81.81        | <b>90.40</b> | 90.07        | 84.41 |
|        | Revolve       | 10     | 76.98      | <b>79.86</b> | 77.70        | 73.56        | 71.06        | 76.98 |
| II     | Prone         | 14     | 61.68      | 65.87        | <b>76.05</b> | 60.68        | 63.09        | 66.64 |
|        | Support       | 8      | 54.17      | 62.50        | 60.41        | 53.84        | <b>63.35</b> | 61.81 |
|        | Balance       | 12     | 82.96      | 82.22        | 80.00        | 92.30        | <b>92.68</b> | 87.41 |
|        | Bending       | 40     | 64.09      | 62.19        | 67.68        | <b>75.52</b> | 66.19        | 62.34 |
|        | Kneeling      | 8      | 60.43      | 69.06        | 66.91        | 69.33        | <b>72.38</b> | 61.87 |
|        | Fine-gained   | 117    | 76.10      | 74.13        | 74.92        | <b>82.94</b> | 78.48        | 70.12 |
| III    | Score         | 4      | 71.40      | 70.97        | 65.43        | <b>72.57</b> | 71.48        | 70.12 |

Table 9: Comparison of recognition accuracies (%) with the state-of-the-art methods on 3D-Yoga. The best results are in bold.

| Methods     | Front        | Side         | Combined     | Fused        |              |              | Average      |
|-------------|--------------|--------------|--------------|--------------|--------------|--------------|--------------|
|             |              |              |              | N            | N+P          | N+P+B        |              |
| ST-GCN [4]  | 53.65        | 56.25        | 56.56        | 58.33        | 59.57        | 56.29        | 56.78        |
| 2S-AGCN [3] | 58.90        | 55.82        | 56.86        | 66.84        | 60.33        | 58.23        | 59.50        |
| CTR-GCN [1] | 73.02        | 66.24        | <b>76.40</b> | 72.93        | 65.38        | 58.65        | 68.77        |
| Ours        | <b>76.10</b> | <b>74.13</b> | 74.92        | <b>82.94</b> | <b>78.48</b> | <b>74.36</b> | <b>76.82</b> |

Table 10: Two-level labels for single person actions in NTU-60 dataset.

| First level labels      | Second level labels                                                                                       |
|-------------------------|-----------------------------------------------------------------------------------------------------------|
| I. Upper limb movement  | A1,A2,A3,A4,A5,A7,A10,A11,A12,A13,A18,A19,A20,A21,A23,A25,A28,A29,A30,A31,A34,A37,A38,A39,A40,A44,A47,A49 |
| II. Lower limb movement | A8,A9,A24,A26,A27,A42                                                                                     |
| III. Head movement      | A35,A36,A41                                                                                               |
| IV. Head movement       | A6,A14,A15,A16,A17,A22,A32,A33,A43,A45,A46,A48,A50                                                        |
